the most common location (4). Acral lentiginous melanoma is the most common melanoma type that presents on the plantar aspect of the foot (3). This type of melanoma is commonly amelanotic, frequently ulcerates (5), and does not exhibit the classic signs of malignant melanoma associated with the mnemonic aid "ABCD" (asymmetry, border, color, diameter). In a review (6) of 53 lower extremity melanomas, 11 of 18 (61%) misdiagnosed cases were on the plantar foot. All misdiagnosed lesions were histopathologically acral lentiginous melanomas. Initial misdiagnoses included nonhealing ulcer, wart, tinea pedis, and onychomycosis. Another retrospective review (7) of palmoplantar melanoma found that misdiagnosis led to a median delay of treatment for 12 months and was associated with increased tumor thickness (5.0 vs. 1.5 mm) and a lower 5-year survival rate (15.4 vs. 68.9%).

We are not supposing that plantar melanoma occurs more frequently in individuals with diabetes. However, we believe there is a greater chance of misdiagnosis given this population's predilection toward plantar ulceration. An individual with peripheral sensory neuropathy is more likely to unknowingly ambulate on a plantar foot lesion, and this increased pressure and trauma can cause a lesion to initially resemble a diabetic foot ulcer. This case and short review emphasizes the importance of performing biopsies on chronic and atypical wounds early in the treatment algorithm of diabetic foot ulcers.

LEE C. ROGERS, DPM<sup>1</sup>

DAVID G. ARMSTRONG, DPM, PHD<sup>1</sup>

ANDREW J.M. BOULTON, MD, FRCPATH<sup>2</sup>

ANTHONY J. FREEMONT, MD, FRCP<sup>3</sup>

RAYAZ A. MALIK, MB, CHB, MRCP, PHD<sup>2</sup>

From the <sup>1</sup>Center for Lower Extremity Ambulatory Research (CLEAR), Rosalind Franklin University of Medicine and Science, Chicago, Illinois; the <sup>2</sup>Divisions of Cardiovascular and Endocrine Science, University of Manchester, Manchester, U.K.; and the <sup>3</sup>Department of Regenerative Medicine, University of Manchester, Manchester, U.K.

Address correspondence to Lee C. Rogers, DPM, Scholl's Center for Lower Extremity Ambulatory Research (CLEAR), Rosalind Franklin University of Medicine, 3333 Green Bay Rd., North Chicago, IL 60064. E-mail: lee.rogers@rosalindfranklin.edu.

DOI: 10.2337/dc06-2251

© 2007 by the American Diabetes Association.

## References

1. Gregson CL, Allain TJ: Amelanotic malignant melanoma disguised as a diabetic

- foot ulcer. *Diabet Med* 21:924–927, 2004
2. Kong MF, Jogia R, Jackson S, Quinn M, McNally P, Davies M: Malignant melanoma presenting as a foot ulcer. *Lancet* 366:1750, 2005
3. Franke W, Neumann NJ, Ruzicka T, Schulte KW: Plantar malignant melanoma: a challenge for early recognition. *Melanoma Res* 10:571–576, 2000
4. Kato T, Tabata N, Suetake T, Tagami H: Non-pigmented nodular plantar melanoma in 12 Japanese patients. *Br J Dermatol* 136:207–211, 1997
5. Dwyer PK, Mackie RM, Watt DC, Aitchison TC: Plantar malignant melanoma in a white Caucasian population. *Br J Dermatol* 128:115–120, 1993
6. Soon SL, Solomon AR Jr, Papadopoulos D, Murray DR, McAlpine B, Washington CV: Acral lentiginous melanoma mimicking benign disease: the Emory experience. *J Am Acad Dermatol* 48:183–188, 2003
7. Metzger S, Ellwanger U, Stroebel W, Schiebel U, Rassner G, Fierlbeck G: Extent and consequences of physician delay in the diagnosis of acral melanoma. *Melanoma Res* 8:181–186, 1998

## COMMENTS AND RESPONSES

### An Open, Randomized, Parallel-Group Study to Compare the Efficacy and Safety Profile of Inhaled Human Insulin (Exubera) With Glibenclamide as Adjunctive Therapy in Patients With Type 2 Diabetes Poorly Controlled on Metformin

Response to Barnett et al.

In response to the interesting article by Barnett et al. (1), we would like to offer the following comments. Diabetes control has been shown to improve with diet and exercise regimens (2,3). The degree of study participants' compliance with diet and exercise regimens may have con-

founded the change in A1C reported in the study (1). Also, the independent effect of BMI on both diabetes control and response to therapy has been studied extensively (4). The effect of modification of baseline BMI on diabetes control among various strata of BMI in both study groups needs clarification.

The open-blinded design of the study (1), especially since it involves diabetes education and self monitoring, can significantly impact internal validity due to both performance bias of the subject with respect to compliance with lifestyle modifications as well as detection bias of the health care providers in ascertaining adverse outcomes (5). In addition, the non-inferiority design offers no protection against a predetermined idea of equivalence by the investigator, who could allocate similar scores to responses and events of all study subjects (6).

BALAVENKATESH KANNA, MD, MPH<sup>1,2</sup>

HEIDI ABREU-PACHECO, MD<sup>1</sup>

From the <sup>1</sup>Department of Internal Medicine, Lincoln Medical & Mental Health Center, Bronx, New York; and the <sup>2</sup>Weill Medical College of Cornell University, New York, New York.

Address correspondence to Balavenkatesh Kanna, MD, MPH, Department of Medicine, Suite 8-22, 8th Floor, 234 E. 149th St., Bronx, NY 10451. E-mail: balavenkatesh.kanna@nychhc.org.

DOI: 10.2337/dc06-2031

© 2007 by the American Diabetes Association.

## References

1. Barnett AH, Dreyer M, Lange P, Serdarevic-Pehar M, the Exubera Phase III Study Group: An open, randomized, parallel-group study to compare the efficacy and safety profile of inhaled human insulin (Exubera) with glibenclamide as adjunctive therapy in patients with type 2 diabetes poorly controlled on metformin. *Diabetes Care* 29:1818–1825, 2006
2. Sigal RJ, Kenny GP, Wasserman DH, Castaneda-Sceppa C, White RD: Physical activity/exercise and type 2 diabetes: a consensus statement from the American Diabetes Association. *Diabetes Care* 29:1433–1438, 2006
3. American Diabetes Association: Nutrition recommendations and interventions for diabetes: a position statement of the American Diabetes Association (Position Statement). *Diabetes Care* 29:2140–2157, 2006
4. Klein S, Sheard NF, Pi-Sunyer X, Daly A, Wylie-Rosett J, Kulkarni K, Clark NG: Weight management through lifestyle modification for the prevention and management of type 2 diabetes: rationale and strategies: a statement of the American Di-

- abetes Association, the North American Association for the Study of Obesity, and the American Society for Clinical Nutrition. *Diabetes Care* 27:2067–2073, 2004
5. Norris SL, Engelgau MM, Venkat Narayan KM: Effectiveness of self-management training in type 2 diabetes: a systematic review of randomized controlled trials. *Diabetes Care* 24:561–587, 2001
  6. Snapinn SM: Noninferiority trials. *Curr Control Trials Cardiovasc Med* 1:19–21, 2000

## An Open, Randomized, Parallel-Group Study to Compare the Efficacy and Safety Profile of Inhaled Human Insulin (Exubera) With Glibenclamide as Adjunctive Therapy in Patients With Type 2 Diabetes Poorly Controlled on Metformin

Response to Kanna and Abreu-Pacheco

**W**e thank Kanna and Abreu-Pacheco (1) for their comments on our study (2). As Kanna and Abreu-Pacheco point out, overweight and obesity are strongly linked to the development of type 2 diabetes and can complicate its management. While most patients with type 2 diabetes are overweight (3), this study (2) included individuals with a range of BMI values typical of those seen in clinical practice; mean BMI in the inhaled insulin and glibenclamide groups was 31.8 (range 19–51) and 31.1 (22–47), respectively. When analyzed by baseline BMI values, the mean change from baseline A1C in the moderately high A1C arm ( $\geq 8$  to  $\leq 9.5\%$ ) was  $-1.6$ ,  $-1.3$ , and  $-1.5\%$  in patients with baseline BMI values of  $<30$ ,  $30$ – $35$ , and  $\geq 35$  kg/m<sup>2</sup>, respectively, compared with  $-1.5\%$  for all subjects. In the very high A1C arm ( $>9.5\%$ ), mean change from baseline A1C was  $-3.1$ ,  $-2.8$ , and  $-2.8\%$  in patients with baseline BMI values of  $<30$ ,  $30$ – $35$ , and  $\geq 35$  kg/m<sup>2</sup>, re-

spectively, compared with  $-2.9\%$  for all subjects. The results show no meaningful differences between the BMI categories, and the authors therefore believe it to be unlikely that the baseline BMI values could have confounded the A1C results.

For the duration of the study, patients were required to follow an American Diabetes Association diet (with 30% fat and calories sufficient to maintain ideal body weight) and to perform 30 min of moderate exercise at least 3 days per week. There was no specific measure of compliance with diet and exercise regimens during the study, but patients were reminded of their importance at each clinic visit.

Finally, we would like to point out that our study was open label and not blinded. As highlighted in the article, a double-blind study, while desirable, was not possible for two principal reasons: 1) it was not possible to manufacture a suitable placebo for inhaled insulin, and 2) it is generally inappropriate to blind treatment when individualized flexible dose titration is needed for effective management with exogenous insulin.

ANTHONY H. BARNETT, BSC, MD, FRCP<sup>1</sup>  
MANFRED DREYER, MD<sup>2</sup>  
PETER LANGE, MD<sup>3</sup>  
MARJANA SERDAREVIC-PEHAR,<sup>4</sup>  
ON BEHALF OF THE EXUBERA PHASE III  
STUDY GROUP

From the <sup>1</sup>University of Birmingham and Heart of England National Health Service Foundation Trust (Teaching), Birmingham, U.K.; the <sup>2</sup>Department of Diabetes and Metabolism, Bethanien Krankenhaus, Hamburg, Germany; the <sup>3</sup>Department of Respiratory Medicine, Hvidovre University Hospital, Hvidovre, Denmark; and <sup>4</sup>Pfizer Ltd., Sandwich, U.K.

Address correspondence to A.H. Barnett, Undergraduate Centre, Birmingham Heartlands Hospital, Bordesley Green East, Birmingham, B9 5SS, U.K. E-mail: anthony.barnett@heartofengland.nhs.uk.

M.S.-P. is an employee of Pfizer.

DOI: 10.2337/dc06-2173

© 2007 by the American Diabetes Association.

### References

1. Kanna B, Abreu-Pacheco H: An open, randomized, parallel-group study to compare the efficacy and safety profile of inhaled human insulin (Exubera) with glibenclamide as adjunctive therapy in patients with type 2 diabetes poorly controlled on metformin (Letter). *Diabetes Care* 30:445–446, 2007
2. Barnett AH, Dreyer M, Lange P, Serdarevic-Pehar M, the Exubera Phase III Study Group: An open, randomized, parallel-group study to compare the efficacy and safety profile of inhaled human insulin (Exubera) with glibenclamide as adjunctive

therapy in patients with type 2 diabetes poorly controlled on metformin. *Diabetes Care* 29:1818–1825, 2006

3. Daousi C, Casson IF, Gill GV, MacFarlane IA, Wilding JPH, Pinkney JH: Prevalence of obesity in type 2 diabetes in secondary care: association with cardiovascular risk factors. *Postgrad Med J* 82:280–284, 2006

## Hyperglycemia and Diabetes in Patients With Schizophrenia or Schizoaffective Disorders

Response to Cohen et al.

**W**e commend Cohen et al. (1) on their report on hyperglycemia and diabetes in patients with schizophrenia and schizoaffective disorders. To our knowledge, this is the first large study of oral glucose tolerance tests in this population.

Cohen et al. found that the prevalence rate of diabetes was significantly higher in patients with schizophrenia and schizoaffective disorders than in the general population. They did not detect a differential effect of antipsychotic monotherapy in diabetogenic effects, and they consequently proposed a modification of the consensus statement on antipsychotic drugs, obesity, and diabetes, i.e., measurement of fasting glucose in all patients with schizophrenia irrespective of the prescribed antipsychotic drug. We argue that the differences in the metabolic effects of different antipsychotic agents are too clear in the literature to justify any notion that the antipsychotic agents are comparable in their metabolic effects.

Comparative studies of antipsychotic agents are limited in their scope by the difficulty in conducting randomized controlled trials of antipsychotic agents. For many patients, specific antipsychotic agents are indicated ahead of the others based on the information available at that time. For example, clozapine is difficult to study in comparative investigations because it is not recommended by most as a first-line treatment. A recent study (2) addressed this issue to some extent by conducting a randomized controlled trial of risperidone and olanzapine in dogs. The dogs who received olanzapine developed hepatic insulin resistance, whereas those who received risperidone did not. Fur-
